# Supplementary material for: Performance Comparisons of AlexNet and GoogLeNet in Cell Growth Inhibition IC50 Prediction
Source: MDPI journal article supplement (doi:10.3390/ijms22147721), 2021-07-19

## Supporting Information

### Performance comparisons of AlexNet and GoogLeNet in cell growth inhibition IC50 prediction

Lee *et al.*

#### Contents

Table S1 through S7

Figure S1

**Table S1. The three models' MCC values in the GDSC test set.**

| <b>OVR classification</b> | <b>GoogLeNet</b> | <b>DeepIC50</b> | <b>LASSO</b> |
|---------------------------|------------------|-----------------|--------------|
| <b>Class 0 vs. others</b> | 0.504256027      | 0.545457535     | 0.557941156  |
| <b>Class 1 vs. others</b> | 0.411364275      | 0.454712104     | 0.392195306  |
| <b>Class 2 vs. others</b> | 0.348978850      | 0.386608536     | 0.281037632  |

**Table S2. Confusion matrix of GoogLeNet in the GDSC test set.**

| <div>Predicted</div> <div>Observed</div> | class 0 | class 1 | class 2 |
|------------------------------------------|---------|---------|---------|
| class 0                                  | 2060    | 894     | 0       |
| class 1                                  | 736     | 25204   | 668     |
| class 2                                  | 0       | 1145    | 1368    |

**Table S3. Confusion matrix of GoogLeNet in the GC cell line test set.**

| Predicted<br>Observed | class 0 | class 1 | class 2 |
|-----------------------|---------|---------|---------|
| class 0               | 171     | 372     | 1       |
| class 1               | 142     | 1954    | 174     |
| class 2               | 0       | 0       | 0       |

**Table S4. Confusion matrix of GoogLeNet in the TCGA-BRCA patient dataset.**

| Observed \ Predicted | Predicted |         |         |
|----------------------|-----------|---------|---------|
|                      | class 0   | class 1 | class 2 |
| class 0              | 137       | 143     | 1       |
| class 1              | 14        | 8       | 0       |
| class 2              | 6         | 13      | 0       |

**Table S5. Comparison of AUROC differences of the two CNN models in contrast with LASSO baseline model in the TCGA-BRCA dataset. '△' indicates the difference in contrast with LASSO.**

|           | △ micro-average AUROC | △ macro-average AUROC |
|-----------|-----------------------|-----------------------|
| LASSO     | 0.00                  | 0.00                  |
| GoogLeNet | 0.03                  | 0.09                  |
| DeepIC50  | -0.03                 | 0.02                  |

**Table S6. Our implementation of GoogLeNet for drug responsiveness prediction.** The GoogLeNet structure uses specific modules called ‘Inception’ and ‘Auxiliary classifier’. The ‘module type’ column represents that type of specific modules, the ‘Param #’ column represents number of parameters, respectively.

| Layer (type)                   | Output Shape | Param # | module type    |
|--------------------------------|--------------|---------|----------------|
| input_1 (InputLayer)           | (167x167x1)  | 0       |                |
| conv2d_1 (Conv2D)              | (84x84x64)   | 3200    |                |
| max_pooling2d_1 (MaxPooling2D) | (42x42x64)   | 0       |                |
| local_response_normalization_1 | (42x42x64)   | 0       |                |
| conv2d_2 (Conv2D)              | (42x42x64)   | 4160    |                |
| conv2d_3 (Conv2D)              | (42x42x192)  | 110784  |                |
| local_response_normalization_2 | (42x42x192)  | 0       |                |
| max_pooling2d_2 (MaxPooling2D) | (21x21x192)  | 0       |                |
| conv2d_5 (Conv2D)              | (21x21x96)   | 18528   | Inception (3a) |
| conv2d_7 (Conv2D)              | (21x21x16)   | 3088    | Inception (3a) |
| max_pooling2d_3 (MaxPooling2D) | (21x21x192)  | 0       | Inception (3a) |
| conv2d_4 (Conv2D)              | (21x21x64)   | 12352   | Inception (3a) |
| conv2d_6 (Conv2D)              | (21x21x128)  | 110720  | Inception (3a) |
| conv2d_8 (Conv2D)              | (21x21x32)   | 12832   | Inception (3a) |
| conv2d_9 (Conv2D)              | (21x21x32)   | 6176    | Inception (3a) |
| concatenate_1 (Concatenate)    | (21x21x256)  | 0       | Inception (3a) |
| conv2d_11 (Conv2D)             | (21x21x128)  | 32896   | Inception (3b) |
| conv2d_13 (Conv2D)             | (21x21x32)   | 8224    | Inception (3b) |
| max_pooling2d_4 (MaxPooling2D) | (21x21x256)  | 0       | Inception (3b) |
| conv2d_10 (Conv2D)             | (21x21x128)  | 32896   | Inception (3b) |
| conv2d_12 (Conv2D)             | (21x21x192)  | 221376  | Inception (3b) |
| conv2d_14 (Conv2D)             | (21x21x96)   | 76896   | Inception (3b) |
| conv2d_15 (Conv2D)             | (21x21x64)   | 16448   | Inception (3b) |
| concatenate_2 (Concatenate)    | (21x21x480)  | 0       | Inception (3b) |
| max_pooling2d_5 (MaxPooling2D) | (11x11x480)  | 0       |                |
| conv2d_17 (Conv2D)             | (11x11x96)   | 46176   | Inception (4a) |
| conv2d_19 (Conv2D)             | (11x11x16)   | 7696    | Inception (4a) |
| max_pooling2d_6 (MaxPooling2D) | (11x11x480)  | 0       | Inception (4a) |
| conv2d_16 (Conv2D)             | (11x11x192)  | 92352   | Inception (4a) |
| conv2d_18 (Conv2D)             | (11x11x208)  | 179920  | Inception (4a) |
| conv2d_20 (Conv2D)             | (11x11x48)   | 19248   | Inception (4a) |
| conv2d_21 (Conv2D)             | (11x11x64)   | 30784   | Inception (4a) |
| concatenate_3 (Concatenate)    | (11x11x512)  | 0       | Inception (4a) |
| conv2d_23 (Conv2D)             | (11x11x112)  | 57456   | Inception (4b) |
| conv2d_25 (Conv2D)             | (11x11x24)   | 12312   | Inception (4b) |

|                                 |             |        |                |
|---------------------------------|-------------|--------|----------------|
| max_pooling2d_7 (MaxPooling2D)  | (11x11x512) | 0      | Inception (4b) |
| conv2d_22 (Conv2D)              | (11x11x160) | 82080  | Inception (4b) |
| conv2d_24 (Conv2D)              | (11x11x224) | 226016 | Inception (4b) |
| conv2d_26 (Conv2D)              | (11x11x64)  | 38464  | Inception (4b) |
| conv2d_27 (Conv2D)              | (11x11x64)  | 32832  | Inception (4b) |
| concatenate_4 (Concatenate)     | (11x11x512) | 0      | Inception (4b) |
| conv2d_29 (Conv2D)              | (11x11x128) | 65664  | Inception (4c) |
| conv2d_31 (Conv2D)              | (11x11x24)  | 12312  | Inception (4c) |
| max_pooling2d_8 (MaxPooling2D)  | (11x11x512) | 0      | Inception (4c) |
| conv2d_28 (Conv2D)              | (11x11x128) | 65664  | Inception (4c) |
| conv2d_30 (Conv2D)              | (11x11x256) | 295168 | Inception (4c) |
| conv2d_32 (Conv2D)              | (11x11x64)  | 38464  | Inception (4c) |
| conv2d_33 (Conv2D)              | (11x11x64)  | 32832  | Inception (4c) |
| concatenate_5 (Concatenate)     | (11x11x512) | 0      | Inception (4c) |
| conv2d_35 (Conv2D)              | (11x11x144) | 73872  | Inception (4d) |
| conv2d_37 (Conv2D)              | (11x11x32)  | 16416  | Inception (4d) |
| max_pooling2d_9 (MaxPooling2D)  | (11x11x512) | 0      | Inception (4d) |
| conv2d_34 (Conv2D)              | (11x11x112) | 57456  | Inception (4d) |
| conv2d_36 (Conv2D)              | (11x11x288) | 373536 | Inception (4d) |
| conv2d_38 (Conv2D)              | (11x11x64)  | 51264  | Inception (4d) |
| conv2d_39 (Conv2D)              | (11x11x64)  | 32832  | Inception (4d) |
| concatenate_6 (Concatenate)     | (11x11x528) | 0      | Inception (4d) |
| conv2d_41 (Conv2D)              | (11x11x160) | 84640  | Inception (4e) |
| conv2d_43 (Conv2D)              | (11x11x32)  | 16928  | Inception (4e) |
| max_pooling2d_10 (MaxPooling2D) | (11x11x528) | 0      | Inception (4e) |
| conv2d_40 (Conv2D)              | (11x11x256) | 135424 | Inception (4e) |
| conv2d_42 (Conv2D)              | (11x11x320) | 461120 | Inception (4e) |
| conv2d_44 (Conv2D)              | (11x11x128) | 102528 | Inception (4e) |
| conv2d_45 (Conv2D)              | (11x11x128) | 67712  | Inception (4e) |
| concatenate_7 (Concatenate)     | (11x11x832) | 0      | Inception (4e) |
| max_pooling2d_11 (MaxPooling2D) | (6x6x832)   | 0      |                |
| conv2d_47 (Conv2D)              | (6x6x160)   | 133280 | Inception (5a) |
| conv2d_49 (Conv2D)              | (6x6x32)    | 26656  | Inception (5a) |
| max_pooling2d_12 (MaxPooling2D) | (6x6x832)   | 0      | Inception (5a) |
| conv2d_46 (Conv2D)              | (6x6x256)   | 213248 | Inception (5a) |
| conv2d_48 (Conv2D)              | (6x6x320)   | 461120 | Inception (5a) |
| conv2d_50 (Conv2D)              | (6x6x128)   | 102528 | Inception (5a) |
| conv2d_51 (Conv2D)              | (6x6x128)   | 106624 | Inception (5a) |
| concatenate_8 (Concatenate)     | (6x6x832)   | 0      | Inception (5a) |
| conv2d_53 (Conv2D)              | (6x6x192)   | 159936 | Inception (5b) |



|                                                     |            |         |                           |
|-----------------------------------------------------|------------|---------|---------------------------|
| conv2d_55 (Conv2D)                                  | (6x6x48)   | 39984   | Inception (5b)            |
| max_pooling2d_13 (MaxPooling2D)                     | (6x6x832)  | 0       | Inception (5b)            |
| conv2d_52 (Conv2D)                                  | (6x6x384)  | 319872  | Inception (5b)            |
| conv2d_54 (Conv2D)                                  | (6x6x384)  | 663936  | Inception (5b)            |
| conv2d_56 (Conv2D)                                  | (6x6x128)  | 153728  | Inception (5b)            |
| conv2d_57 (Conv2D)                                  | (6x6x128)  | 106624  | Inception (5b)            |
| average_pooling2d_1 (AveragePooling2D)              | (3x3x512)  | 0       | Inception (5b)            |
| average_pooling2d_2 (AveragePooling2D)              | (3x3x528)  | 0       | Inception (5b)            |
| concatenate_9 (Concatenate)                         | (6x6x1024) | 0       | Inception (5b)            |
| conv2d_58 (Conv2D)                                  | (3x3x128)  | 65664   | average pooling           |
| conv2d_59 (Conv2D)                                  | (3x3x128)  | 67712   | average pooling           |
| global_average_pooling2d_1 (GlobalAveragePooling2D) | (1024)     | 0       | average pooling           |
| flatten_1 (Flatten)                                 | (1152)     | 0       | auxiliary classifier (4a) |
| flatten_2 (Flatten)                                 | (1152)     | 0       | auxiliary classifier (4d) |
| dropout_1 (Dropout)                                 | (1024)     | 0       | main classifier           |
| dense_2 (Dense)                                     | (1024)     | 1180672 | auxiliary classifier (4a) |
| dense_3 (Dense)                                     | (1024)     | 1180672 | auxiliary classifier (4d) |
| dense_1 (Dense)                                     | (1000)     | 1025000 | main classifier           |
| dropout_2 (Dropout)                                 | (1024)     | 0       | auxiliary classifier (4a) |
| dropout_3 (Dropout)                                 | (1024)     | 0       | auxiliary classifier (4d) |
| main_classifier (Dense)                             | (3)        | 3003    | main classifier           |
| auxiliary_4a (Dense)                                | (3)        | 3075    | auxiliary classifier (4a) |
| auxiliary_4d (Dense)                                | (3)        | 3075    | auxiliary classifier (4d) |

Total Parameters : 9,496,153

**Table S7. Model architecture of DeepIC50.** The 'Param #' column represents number of parameters, respectively.

| Layer (type)                                | Output Shape | Param #   |
|---------------------------------------------|--------------|-----------|
| input_1 (InputLayer)                        | (27889×1)    | 0         |
| conv1d_1 (Conv1D)                           | (27889×16)   | 192       |
| batch_normalization_1 (BatchNormalization)  | (27889×16)   | 64        |
| conv1d_2 (Conv1D)                           | (27889×16)   | 2832      |
| batch_normalization_2 (BatchNormalization)  | (27889×16)   | 64        |
| max_pooling1d_1 (MaxPooling1D)              | (13945×16)   | 0         |
| conv1d_3 (Conv1D)                           | (13945×32)   | 5664      |
| batch_normalization_3 (BatchNormalization)  | (13945×32)   | 128       |
| conv1d_4 (Conv1D)                           | (13945×32)   | 11296     |
| max_pooling1d_2 (MaxPooling1D)              | (6973×32)    | 0         |
| batch_normalization_4 (BatchNormalization)  | (6973×32)    | 128       |
| conv1d_5 (Conv1D)                           | (6973×64)    | 22592     |
| batch_normalization_5 (BatchNormalization)  | (6973×64)    | 256       |
| max_pooling1d_3 (MaxPooling1D)              | (3487×64)    | 0         |
| conv1d_6 (Conv1D)                           | (3487×64)    | 45120     |
| batch_normalization_6 (BatchNormalization)  | (3487×64)    | 256       |
| max_pooling1d_4 (MaxPooling1D)              | (1744×64)    | 0         |
| flatten_1 (Flatten)                         | (111616)     | 0         |
| dense_1 (Dense)                             | (1024)       | 114295808 |
| batch_normalization_7 (BatchNormalization)  | (1024)       | 4096      |
| dropout_1 (Dropout)                         | (1024)       | 0         |
| dense_2 (Dense)                             | (2048)       | 2099200   |
| batch_normalization_8 (BatchNormalization)  | (2048)       | 8192      |
| dropout_2 (Dropout)                         | (2048)       | 8392704   |
| dense_3 (Dense)                             | (4096)       | 16384     |
| batch_normalization_9 (BatchNormalization)  | (4096)       | 0         |
| dropout_3 (Dropout)                         | (4096)       | 8390656   |
| dense_4 (Dense)                             | (2048)       | 8192      |
| batch_normalization_10 (BatchNormalization) | (2048)       | 0         |
| dropout_4 (Dropout)                         | (2048)       | 2098176   |
| dense_5 (Dense)                             | (1024)       | 4096      |
| batch_normalization_11 (BatchNormalization) | (1024)       | 0         |
| dropout_5 (Dropout)                         | (1024)       | 3075      |
| dense_6 (Dense)                             | (3)          | 135409171 |

Total Parameters : 135,409,171

**Figure S1. Application of the three models to the TCGA-BRCA Patient Dataset.**

**(A)** ROC curves representing the performance of GoogLeNet for the TCGA-BRCA patient dataset. **(B)** Micro-average ROC curves comparing the prediction performances of two CNN models and LASSO for the TCGA-BRCA patient dataset. **(C)** Macro-average ROC curves comparing the prediction performances of two CNN models and LASSO for the TCGA-BRCA patient dataset.

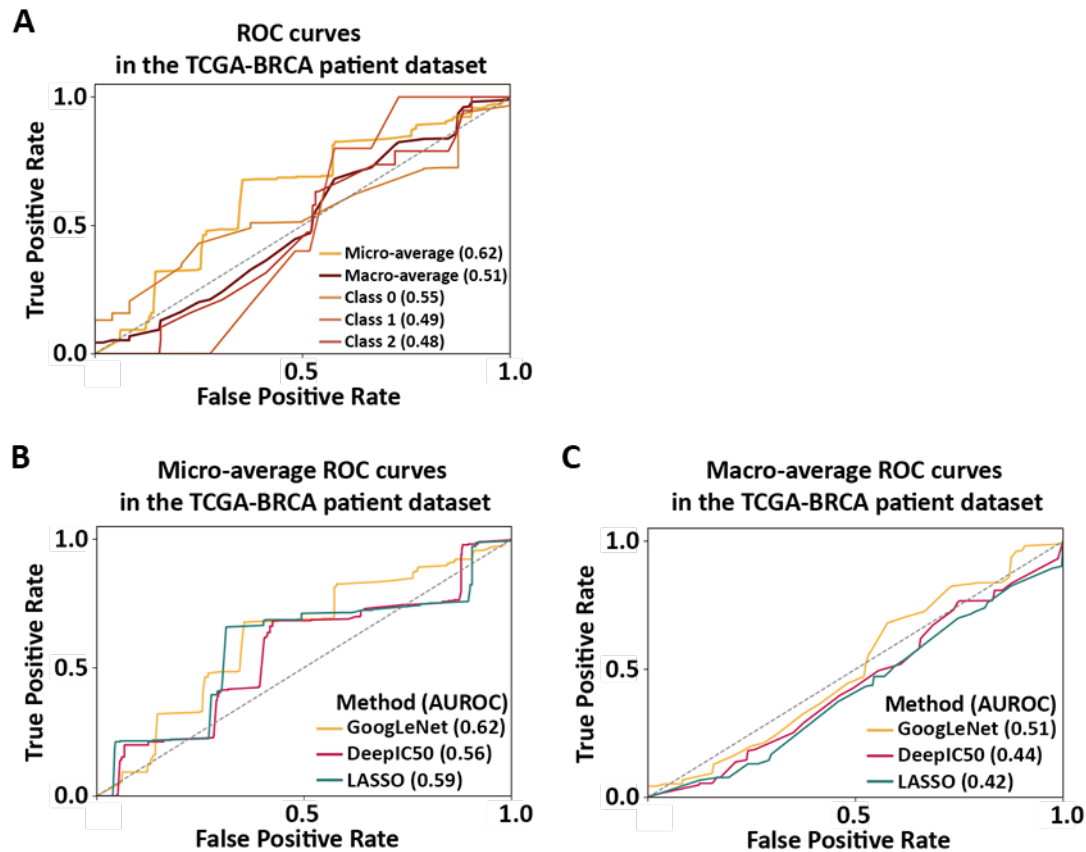

Supplement: s1 [file s1]
